# Supplementary material
Source: publisher figshare collection journal article supplement (https://acs.figshare.com/ndownloader/files/25418365)
Supplement: Supplementary file 1 [file 25418365]

Supporting Information for

# Effects of Hydrogen and Hydrothermal Pretreatments on Silica-supported Copper Catalyst for CO Oxidation: Copper Hydroxy Active Species

*Miao-Miao Wang,<sup>†,‡</sup> Jing Yu,<sup>§</sup> Wei-Wei Wang,<sup>||</sup> Jun-Xiang Chen,<sup>∇</sup> Chun-Jiang Jia,<sup>\*,||</sup>*

*Rui Si<sup>\*,†</sup>*

<sup>†</sup>Shanghai Synchrotron Radiation Facility, Shanghai Institute of Applied Physics,  
Chinese Academy of Sciences, Shanghai 201204, China.

<sup>‡</sup> University of Chinese Academy of Science, Beijing 100049, China.

<sup>§</sup> Shanghai Institute of Measurement and Testing Technology, Shanghai 200233,  
China.

<sup>||</sup> Key Laboratory for Colloid and Interface Chemistry, Key Laboratory of Special  
Aggregated Materials, School of Chemistry and Chemical Engineering, Shandong  
University, Jinan 250100, China.

<sup>∇</sup> Division of China, TILON Group Technology Limited, Shanghai 200090, China.

Email: sirui@sinap.ac.cn; jiacj@sdu.edu.cn

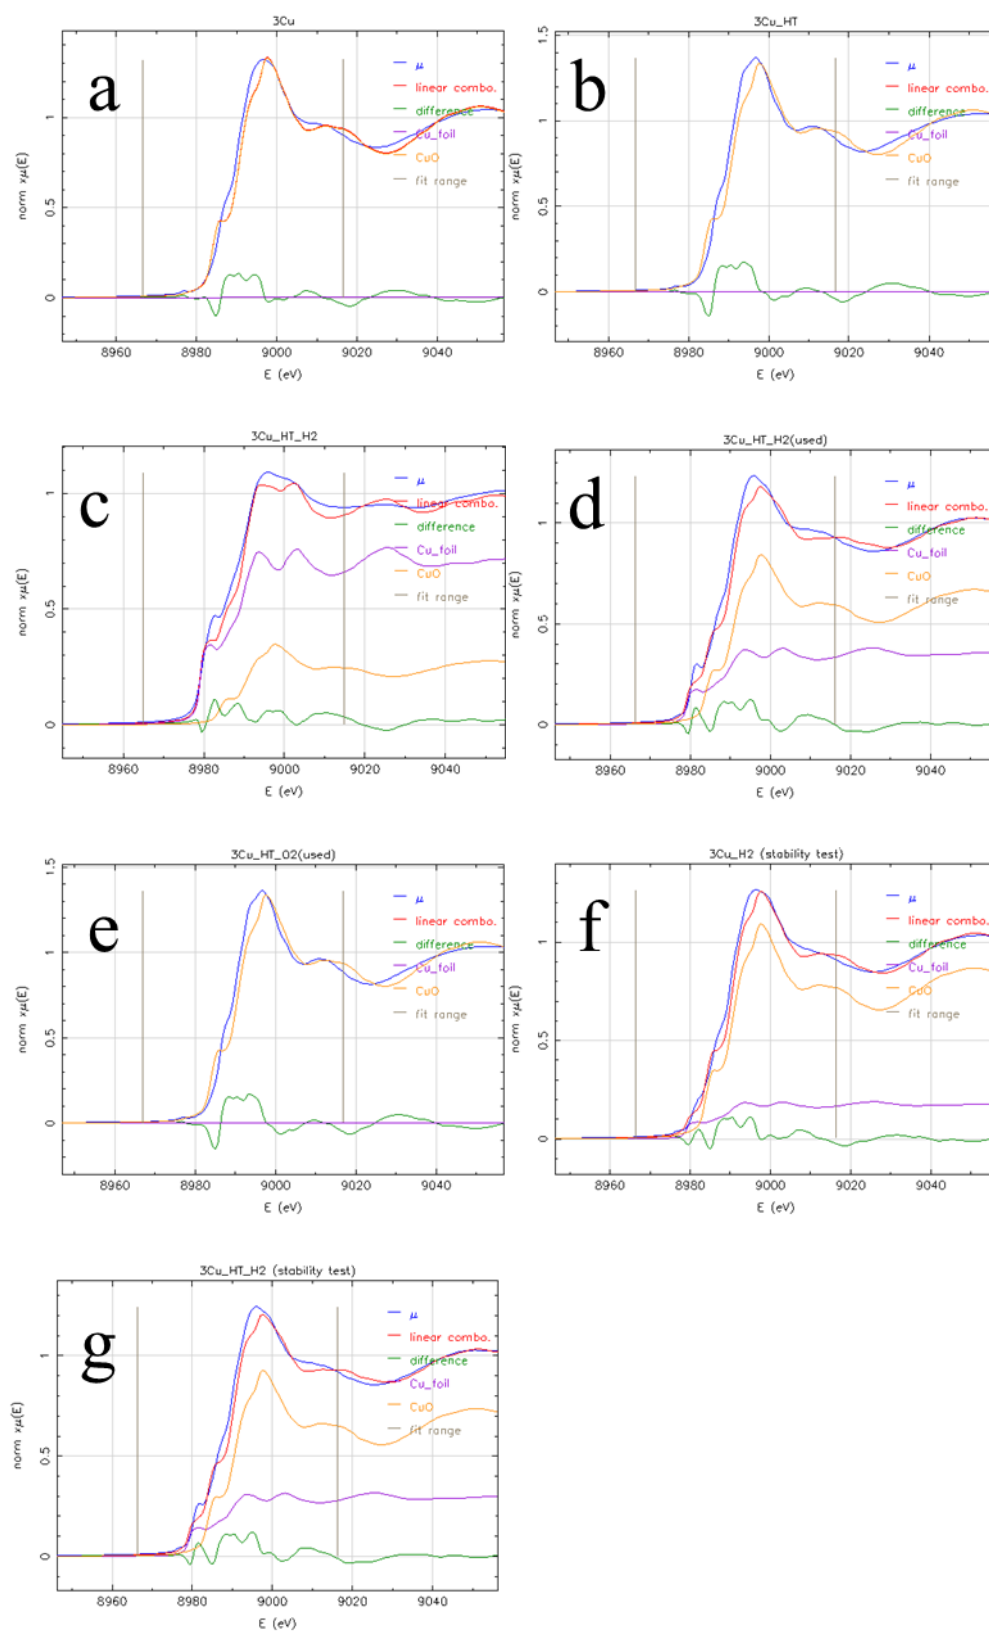

**Figure S1** Determination of the oxidation state of Cu by the linear combination fit with the help of various references (Cu foil for Cu<sup>0</sup> and CuO for Cu<sup>2+</sup>) according to

the XANES profiles.

**Table S1 the Molar Proportion of Cu<sup>0</sup> and Cu<sup>2+</sup>, the Oxidation State of Cu ( $\delta$ )**

| sample                                   | Cu <sup>0</sup> (%) <sup>a</sup> | Cu <sup>2+</sup> (%) <sup>b</sup> | $\delta$ |
|------------------------------------------|----------------------------------|-----------------------------------|----------|
| <b>3Cu</b>                               | 0.5                              | 99.5                              | 2        |
| <b>3Cu_HT</b>                            | 0                                | 100                               | 2        |
| <b>3Cu_HT_O<sub>2</sub>(used)</b>        | 0                                | 100                               | 2        |
| <b>3Cu_HT_H<sub>2</sub>(used)</b>        | 37.9                             | 62.1                              | 1.2      |
| <b>3Cu_HT_H<sub>2</sub></b>              | 74.0                             | 26.0                              | 0.5      |
| <b>3Cu_H<sub>2</sub></b> <sup>c</sup>    | 18.3                             | 81.7                              | 1.6      |
| <b>3Cu_HT_H<sub>2</sub></b> <sup>c</sup> | 30.8                             | 69.2                              | 1.4      |

<sup>a</sup> From Cu foil. <sup>b</sup> From CuO. <sup>c</sup> After stability test.
